# Supplementary material for: The genetic architecture of multimodal human brain age
Source: PubMed Central journal article supplement (PMC10960798; doi:10.1038/s41467-024-46796-6), 2024-03-23
Supplement: 41467_2024_46796_MOESM1_ESM.pdf [file 41467_2024_46796_MOESM1_ESM.pdf]

# 1 **The Genetic Architecture of Multimodal Human Brain Age**

2 Junhao Wen<sup>1\*</sup>, Bingxin Zhao<sup>2</sup>, Zhijian Yang<sup>3</sup>, Guray Erus<sup>3</sup>, Ioanna Skampardoni<sup>3</sup>, Elizabeth Mamourian<sup>3</sup>,  
3 Yuhan Cui<sup>3</sup>, Gyujoon Hwang<sup>3</sup>, Jingxuan Bao<sup>4</sup>, Aleix Boquet-Pujadas<sup>5</sup>, Zhen Zhou<sup>3</sup>, Yogasudha Veturi<sup>6</sup>,  
4 Marylyn D. Ritchie<sup>7</sup>, Haochang Shou<sup>3</sup>, Paul M. Thompson<sup>8</sup>, Li Shen<sup>4</sup>, Arthur W. Toga<sup>9</sup>, Christos  
5 Davatzikos<sup>3</sup>

6  
7 <sup>1</sup>Laboratory of AI and Biomedical Science (LABS), Stevens Neuroimaging and Informatics Institute, Keck School  
8 of Medicine of USC, University of Southern California, Los Angeles, CA, USA

9 <sup>2</sup>Department of Statistics and Data Science, University of Pennsylvania, Philadelphia, PA, USA

10 <sup>3</sup>Artificial Intelligence in Biomedical Imaging Laboratory (AIBIL), Center for AI and Data Science for Integrated  
11 Diagnostics (AI<sup>2</sup>D), Perelman School of Medicine, University of Pennsylvania, Philadelphia, PA, USA

12 <sup>4</sup>Department of Biostatistics, Epidemiology and Informatics, University of Pennsylvania Perelman School of Medicine,  
13 Philadelphia, PA, USA

14 <sup>5</sup>Biomedical Imaging Group, EPFL, Lausanne, Switzerland

15 <sup>6</sup>Department of Biobehavioral Health and Statistics, Penn State University, University Park, PA, USA

16 <sup>7</sup>Department of Genetics and Institute for Biomedical Informatics, Perelman School of Medicine, University of  
17 Pennsylvania, Philadelphia, PA, USA

18 <sup>8</sup>Imaging Genetics Center, Mark and Mary Stevens Neuroimaging and Informatics Institute, Keck School of  
19 Medicine of USC, University of Southern California, Marina del Rey, CA, USA

20 <sup>9</sup>Laboratory of Neuro Imaging (LONI), Stevens Neuroimaging and Informatics Institute, Keck School of Medicine  
21 of USC, University of Southern California, Los Angeles, CA, USA

22  
23 \*Corresponding author:

24 Junhao Wen, [junhaowe@usc.edu](mailto:junhaowe@usc.edu)

25 2025 Zonal Ave, Los Angeles, CA 90033, United States

26

- 27 **Supplementary method 1: Image quality check for MUSE**
- 28 **Supplementary method 2: The definition of genomic loci, independent significant SNP, lead**  
29 **SNP, candidate SNP**
- 30 **Supplementary note1: Seven sensitivity check analyses for the three primary GWASs on**  
31 **European ancestry populations**
- 32 **Supplementary note2: Exemplary genomic locus linked to GM, WM, and FC-BAG**
- 33 **Supplementary figure 1: Split-sample genome-wide association results**
- 34 **Supplementary figure 2: Sex-stratified genome-wide association results**
- 35 **Supplementary figure 3: Non-European genome-wide association results**
- 36 **Supplementary figure 4: fastGWA for mixed linear models**
- 37 **Supplementary figure 5: Machine learning-specific GWAS**
- 38 **Supplementary figure 6: Feature type-specific GWAS**
- 39 **Supplementary figure 7: Independent WGS dataset for GM-BAG GWAS**
- 40 **Supplementary figure 8: Genetic correlation ( $g_c$ ) between the GM, WM, and FC-BAG**  
41 **using the LDSC software in the split-sample analyses**
- 42 **Supplementary figure 9: Incremental R<sup>2</sup> of the PRS derived by the PLINK C+T approach**
- 43 **Supplementary figure 10: Results for the inverse Mendelian randomization for the seven**  
44 **clinical traits**
- 45 **Supplementary figure 11: Sensitivity check for all other significant exposure variables in**  
46 **the forward MR analyses for A) cancer on GM-BAG, B) diabetes on GM-BAG, and C) AD**  
47 **on WM-BAG**
- 48 **Supplementary figure 12: RNA expression overview of the *DNAJC1* gene in various cancer**  
49 **types**
- 50 **Supplementary figure 13: The five-layer neural network used for age prediction and its**  
51 **performance using WM-IDP**
- 52 **Supplementary table 1: Brain age prediction performance using GM, WM, and FC-IDP**
- 53 **Supplementary table 2: Identified genomic loci and mapped genes**
- 54 **Supplementary table 3: Selected clinical traits for genetic correlation analyses**
- 55 **Supplementary table 4: Selected exposure variables for the forward Mendelian**  
56 **randomization**
- 57 **Supplementary table 5: Study characteristics.**

58 **Supplementary method 1: Image quality check for MUSE**

59 T1-weighted MRIs were first quality checked (QC) for motion, image artifacts, or restricted  
60 field-of-view. Additional QC was performed as follows: First, the images were examined by  
61 manually evaluating for pipeline failures (e.g., poor brain extraction, tissue segmentation, and  
62 registration errors). Furthermore, a second step automatically flagged images based on outlying  
63 values of quantified metrics; those images were re-evaluated.

64

65 **Supplementary method 2: The definition of genomic loci, independent significant SNP, lead**  
66 **SNP, candidate SNP**

67 FUMA defined the significant independent SNPs, lead SNPs, candidate SNPs, and genomic risk  
68 loci as follows (<https://fuma.ctglab.nl/tutorial#snp2gene>):

69 *Independent significant SNPs*

70 They are defined as SNPs with  $P \leq 5 \times 10^{-8}$  independent of each other at the user-defined  $r^2$  (set to  
71 0.6 in the current study). We further describe *candidate SNPs* as those in linkage disequilibrium  
72 (LD) with independent significant SNPs. FUMA then queries each candidate SNP in the GWAS  
73 Catalog to check whether any clinical traits have been reported to be associated with previous  
74 GWAS studies.

75 *Lead SNPs*

76 Lead SNPs are defined as independent significant SNPs that are also independent of each other at  
77  $r^2 < 0.1$ . If multiple independent significant SNPs are correlated at  $r^2 \geq 0.1$ , then the one with the  
78 lowest individual  $P$ -value becomes the lead SNP. If the  $r^2$  threshold is set to 0.1 for the independent  
79 significant SNPs, then they will constitute the identical set as the lead SNPs by definition. FUMA  
80 thus advises setting  $r^2$  to be 0.6 or higher.

81 *Genomic risk loci*

82 FUMA defines genomic risk loci to include all independent signals physically close or overlapping  
83 in a single locus. First, independent significant SNPs dependent on each other at  $r^2 \geq 0.1$  are  
84 assigned to the same genomic risk locus. Then, independent significant SNPs with less than the  
85 user-defined distance (250 kilobases by default) away from one another are merged into the same  
86 genomic risk locus - the distance between two LD blocks of two independent significant SNPs is  
87 the distance between the closest points from each LD block. Each locus is represented by the SNP  
88 within the locus with the lowest  $P$ -value.  
89

90 **Supplementary note1: Seven sensitivity check analyses for the three primary GWASs on**  
91 **European ancestry populations**

92 We performed seven sensitivity check analyses to scrutinize the robustness of our primary  
93 GWASs on European ancestry populations.

94 **Split-sample GWAS**

95 *P-value:*

96 We noted high concordance rates between the split1 (as discovery, 15,778<N<16,008) and split2  
97 (as replication, 15,778<N<16,008) GWASs. Specifically, for GM-BAG, we observed a  
98 concordance rate of 99% (3090 out of 3092 SNPs; P-value<0.05/3092), and for WM-BAG, the  
99 concordance rate reached 100% (116/116). FC-BAG did not achieve significant genome-wide  
100 results in the split-sample GWASs

101 *β value:*

102 We assessed the concordance of the  $\beta$  values between split1 and split2 GWASs. For GM-BAG,  
103 all the 3092 significantly replicated SNP (P-value<0.05) showed the same sign of  $\beta$  values from  
104 the linear regression models (Pearson's  $r=0.67$ ; P-value< $1 \times 10^{-10}$ ). For WM-BAG, all the 116  
105 significantly replicated SNP (P-value<0.05) showed the same sign (Pearson's  $r=0.98$ ; P-  
106 value< $1 \times 10^{-10}$ ) (**Supplementary Figure 1 and eFile 1**).

107

108 **Sex-stratified GWAS**

109 *P-value:*

110 In sex-stratified GWASs, the concordance rates were 100% (3072/3072, P-value<0.05/3072) for  
111 GM-BAG and 88.6% (116/131, P-value<0.05/131) for WM-BAG when comparing the male-  
112 GWAS (as replication, 14,969<N<15,127) to female-GWAS (as discovery, 16,588<N<16,890).  
113 FC-BAG did not achieve significant genome-wide results.

114 *β* value:

115 For GM-BAG, the 3072 significantly replicated SNP (P-value<0.05) showed the same sign of *β*  
116 values from the linear regression models (Pearson's  $r=0.36$ ; P-value< $1 \times 10^{-10}$ ). For WM-BAG,  
117 the 116 significantly replicated SNP (P-value<0.05) showed the same sign (Pearson's  $r=0.99$ ; P-  
118 value< $1 \times 10^{-10}$ ) (**Supplementary Figure 2** and **eFile 2**).

119

## 120 **Non-European GWAS**

121 *P*-value:

122 The concordance rates of the GWASs using non-European ancestry populations (as replication,  
123  $4646 < N < 5091$ ) were low compared to the main GWASs using the European population: only  
124 13.78% for GM-BAG (277/2009; P-value<0.05) and 41.94% for WM-BAG (198/472; P-  
125 value<0.05).

126 *β* value:

127 For GM-BAG, the 277 significantly replicated SNP (P-value<0.05) showed the same sign of *β*  
128 values from the linear regression models (Pearson's  $r=0.97$ ; P-value< $1 \times 10^{-10}$ ). For WM-BAG,  
129 the 198 significantly replicated SNP (P-value<0.05) showed the same sign (Pearson's  $r=0.99$ ; P-  
130 value< $1 \times 10^{-10}$ ) (**Supplementary Figure 3** and **eFile 3**)

131

## 132 **Mixed linear model GWAS**

133 *P*-value:

134 A mixed linear model employed via fastGWA<sup>1</sup> (as replication,  $31,557 < N < 32,017$ ) obtained  
135 100% concordance rates for GM (3382/3382), WM (521/521), and FC-BAG (2/2) compared to  
136 GWAS using PLINK linear regression. The genetic loci, genomic inflation factor ( $\lambda$ ), and the

137 LDSC intercepts for GM, WM, and FC-BAG were similar between the PLINK and fastGWA  
138 analyses.

139 *β* value:

140 For GM-BAG, the 3382 significantly replicated SNP (P-value<0.05) showed the same sign of *β*  
141 values from the linear regression models (Pearson's  $r=1$ ; P-value< $1 \times 10^{-10}$ ). For WM-BAG, the  
142 521 significantly replicated SNP (P-value<0.05) showed the same sign (Pearson's  $r=1$ ; P-  
143 value< $1 \times 10^{-10}$ ). For FC-BAG, the 2 significantly replicated SNP (P-value<0.05) showed the  
144 same sign. (**Supplementary Figure 4** and **eFile 4**).

145

#### 146 **Machine learning model-specific GWAS**

147 We used GM-BAG to demonstrate this sensitivity check by comparing *i*) SVR using MUSE  
148 ROIs and *ii*) CNN using voxel images<sup>2</sup> (GWAS summary statistics shared by the authors) to our  
149 main results obtained from Lasso using MUSE ROIs.

150 *P*-value:

151 When comparing the SVR using MUSE ROIs (as replication, MAE=4.43 years) to Lasso using  
152 MUSE ROIs (as discovery, MAE=4.39 years), we found a 100% concordance rate of the SNPs  
153 identified for the GM-BAG GWAS. The BAGs derived from the two machine learning models  
154 were highly correlated ( $r=0.99$ ; P-value< $1 \times 10^{-10}$ ).

155 When comparing the CNN using voxel-wise images (MAE~2.5 years<sup>2</sup>) to Lasso using  
156 MUSE ROIs (as discovery), we found an 82.70% concordance rate (2533; 319 missing SNPs)  
157 after Bonferroni correction (P-value<0.05/3063).

158 *β* value:

159 When comparing the SVR using MUSE ROIs to Lasso using MUSE ROIs (as discovery), we  
160 found that the 3382 significantly replicated SNP (P-value<0.05) showed the same sign of  $\beta$   
161 values from the linear regression models (Pearson's  $r=1$ ; P-value< $1 \times 10^{-10}$ ).

162 When comparing the CNN using voxel-wise images (MAE~2.5 years<sup>2</sup>) to Lasso using  
163 MUSE ROIs (as discovery), we found that all 2762 significantly replicated SNP (P-value<0.05)  
164 showed the same sign of  $\beta$  values from the linear regression models (Pearson's  $r=1$ ; P-  
165 value< $1 \times 10^{-10}$ ). (**Supplementary Figure 5** and **eFile 5**).

166

### 167 **Feature type-specific GWAS**

168 *P-value:*

169 We finally found a 92.43% concordance rate of the SNPs identified in the GM-BAG GWAS  
170 using the 119 MUSE ROIs<sup>3</sup> (as discovery, MAE=4.39 years) and voxel-wide RAVENS<sup>4</sup> maps  
171 (as replication, P-value < 0.05/3382, MAE=5.12 years). The BAGs derived from the two types of  
172 features were significantly correlated ( $r=0.74$ ; P-value< $1 \times 10^{-10}$ ). The brain age prediction  
173 performance using RAVENS showed marginal overfitting, with an MAE of 4.31 years in the  
174 training/validation/test dataset and an MAE of 5.12 years in the independent test dataset.

175  *$\beta$  value:*

176 3183 significantly replicated SNP (P-value<0.05) showed the same sign of  $\beta$  values from the  
177 linear regression models (Pearson's  $r=0.99$ ; P-value< $1 \times 10^{-10}$ ) (**Supplementary Figure 6** and  
178 **eFile 6**)

179

### 180 **ADNI WGS GWAS**

181 *P-value:*



182 We evaluated the generalizability of the GM-BAG GWAS findings from the UKBB dataset to  
183 the ADNI whole-genome sequencing (WGS) data. When considering the concordance rate based  
184 on P-values, we observed a high concordance rate (83.57 %) for the GWASs performed using  
185 the ADNI WGS data ( $N=1104$ ) as a replication dataset ( $N=2583$  out of 3091; 291 SNPs missing  
186 from the ADNI data) using a nominal P-value threshold. No SNPs survived the Bonferroni  
187 correction.

188  *$\beta$  value:*

189 However, it's noteworthy that the  $\beta$  values of these significant SNPs exhibited a significant  
190 correlation ( $r=0.83$ ;  $P\text{-value}<1\times 10^{-10}$ ) between the two datasets. This observation underscores the  
191 importance of collecting genetic data within specific disease populations and throughout the  
192 entire lifespan (**Supplementary Figure 7** and **eFile 7**).

193 **Supplementary note2: Exemplary genomic locus linked to GM, WM, and FC-BAG**

194 The genomic locus (top lead SNP: rs534115641, **Fig. 2C**) linked to GM-BAG was mapped to  
195 multiple protein-encoding genes by position, eQTL, and chromatin interaction. The *NSF* gene,  
196 which encodes *N*-ethylmaleimide-sensitive fusion proteins, plays a key role in transferring  
197 membrane vesicles between cellular compartments. This gene has been linked to several  
198 conditions, including Parkinson's disease (PD)<sup>5</sup>, epithelial ovarian cancer<sup>6</sup>, cognitive traits<sup>7</sup>, and  
199 fibromuscular dysplasia<sup>8</sup>. The *CRHRI* gene encodes a G protein-coupled receptor, which  
200 specifically binds to neuropeptides of the corticotropin-releasing hormone family. These  
201 neuropeptides are recognized as key regulators of the hypothalamic-pituitary-adrenal pathway. A  
202 prior GWAS<sup>9</sup> corroborated the association of this gene with the response to environmental stress,  
203 providing substantive support for the engagement of the hypothalamic-pituitary-adrenal axis, the  
204 central nervous system, and the endocrine system in regulating stress response<sup>10</sup>. We also  
205 identified a highly polygenic genomic locus (top lead SNP: rs564819152, **Fig. 2D**) for WM-  
206 BAG. This locus mapped to the *SKIDA1*, *CASC10*, *MLLT10*, and *DNAJC1* genes – all implicated  
207 in various types of cancer. In contrast, the FC-BAG locus was novel and did not map to any  
208 genes. All mapped genes for GM and WM-BAG are presented in **Supplementary Table 2**.  
209

210 **Supplementary figure 1: Split-sample genome-wide association results**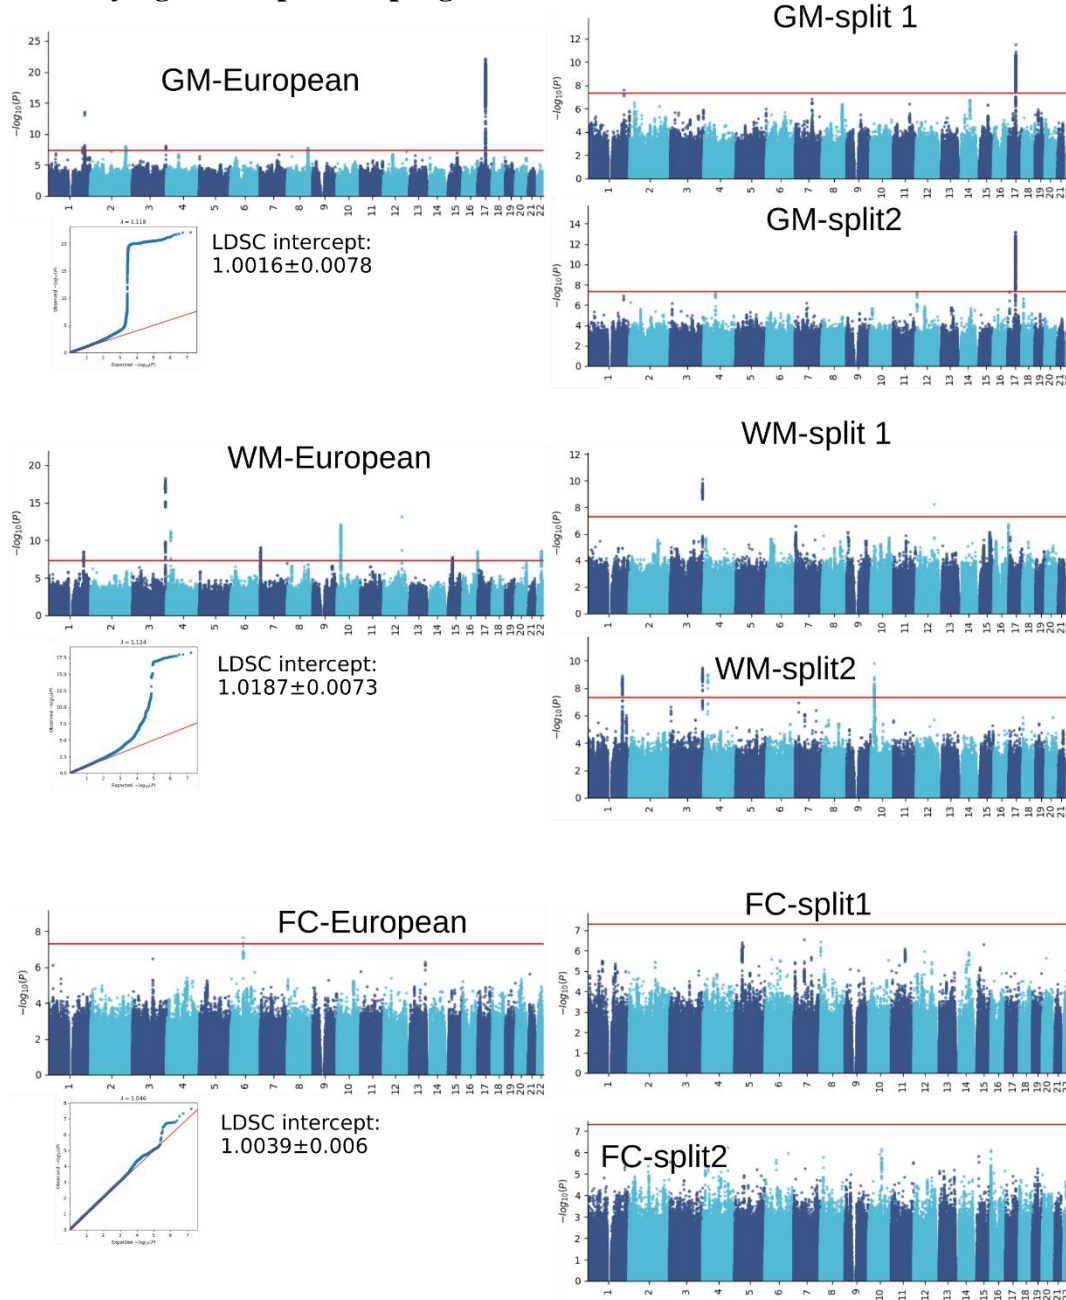

211  
 212 Genome-wide associations are presented for split-sample analyses (split1 vs. split2 vs. all).  
 213 Genomic loci were identified using a genome-wide P-value threshold [ $-\log_{10}(\text{P-value}) > 7.30$ ].  
 214 The sample sizes for GM-European, GM-split1, and GM-split2 are 31557, 15778, and 15778,  
 215 respectively. The sample sizes for WM-European, WM-split1, and WM-split2 are 31674, 15837,  
 216 and 15837, respectively. The sample sizes for FC-European, FC-split1, and FC-split2 are 32017,  
 217 16008, and 16008, respectively.  
 218

219 **Supplementary figure 2: Sex-stratified genome-wide association results**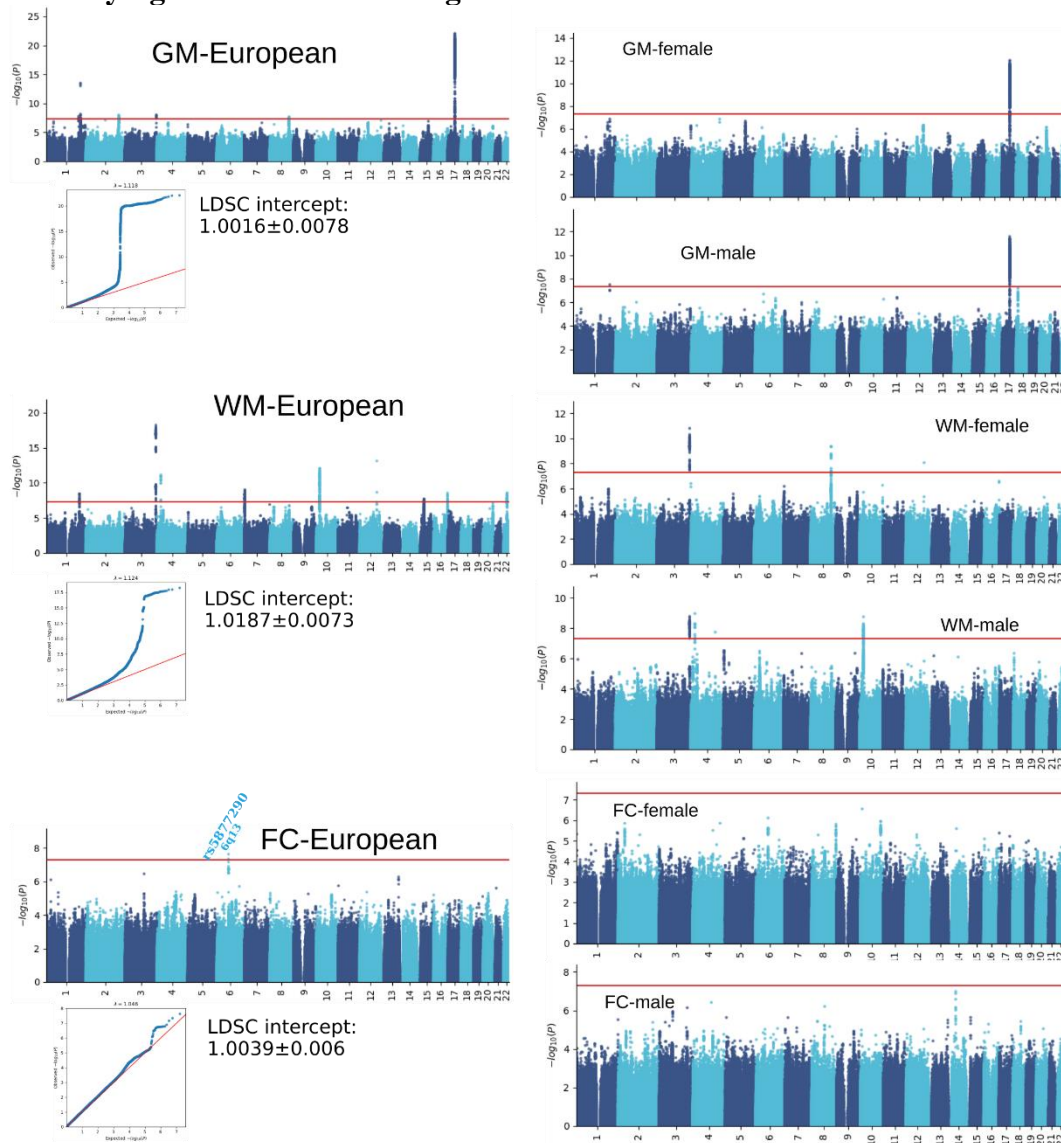

220  
 221  
 222  
 223  
 224  
 225  
 226  
 227

Genome-wide associations are presented for sex-stratified analyses (females vs. males). Genomic loci were identified using a genome-wide P-value threshold [ $-\log_{10}(\text{P-value}) > 7.30$ ]. The sample sizes for GM-European, GM-female, and GM-male are 31557, 16558, and 14969, respectively. The sample sizes for WM-European, WM-female, and WM-male are 31674, 16693, and 14981, respectively. The sample sizes for FC-European, FC-female, and FC-male are 32017, 16890, and 15127, respectively.

228 **Supplementary figure 3: Non-European genome-wide association results**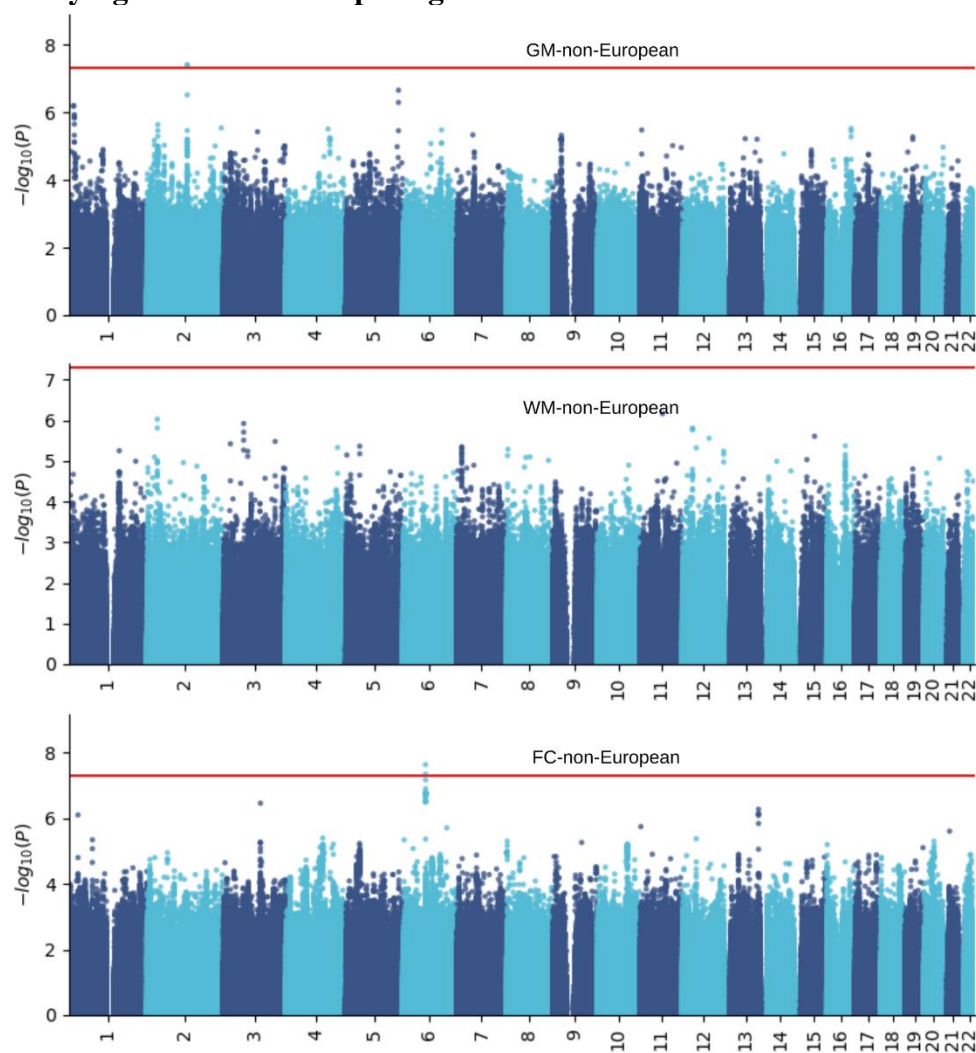

229

230 Genome-wide associations are presented for non-European populations in the UKBB study.

231 Genomic loci associated were identified using a genome-wide P-value threshold [ $-\log_{10}(P$ 232 value)  $> 7.30$ ]. The sample sizes for GM-non-European, WM-non-European, and FC-non-

233 European are 4646, 5091, and 4728, respectively.

234

235 **Supplementary figure 4: fastGWA for mixed linear models**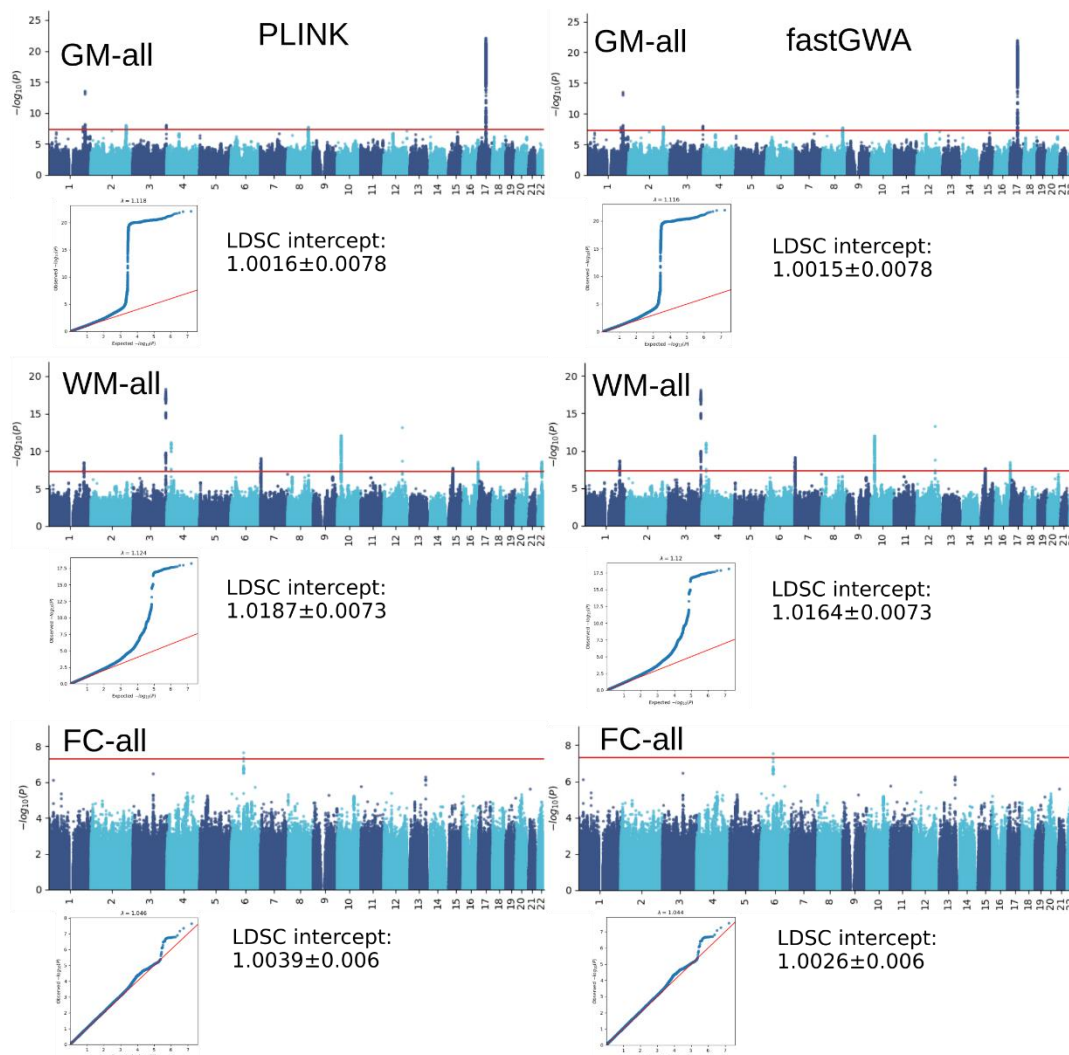

236  
 237  
 238  
 239  
 240  
 241  
 242

Genome-wide associations are presented for European populations in the UKBB study using fastGWA vs. PLINK. Genomic loci associated were identified using a genome-wide P-value threshold [ $-\log_{10}(P\text{-value}) > 7.30$ ]. The sample sizes for GM-all, WM-all, and FC-all are 31557, 31674, and 32017 for PLINK, respectively. The sample sizes for GM-all, WM-all, and FC-all are 31557, 31674, and 32017 for fastGWA, respectively.

243 **Supplementary figure 5: Machine learning-specific GWAS**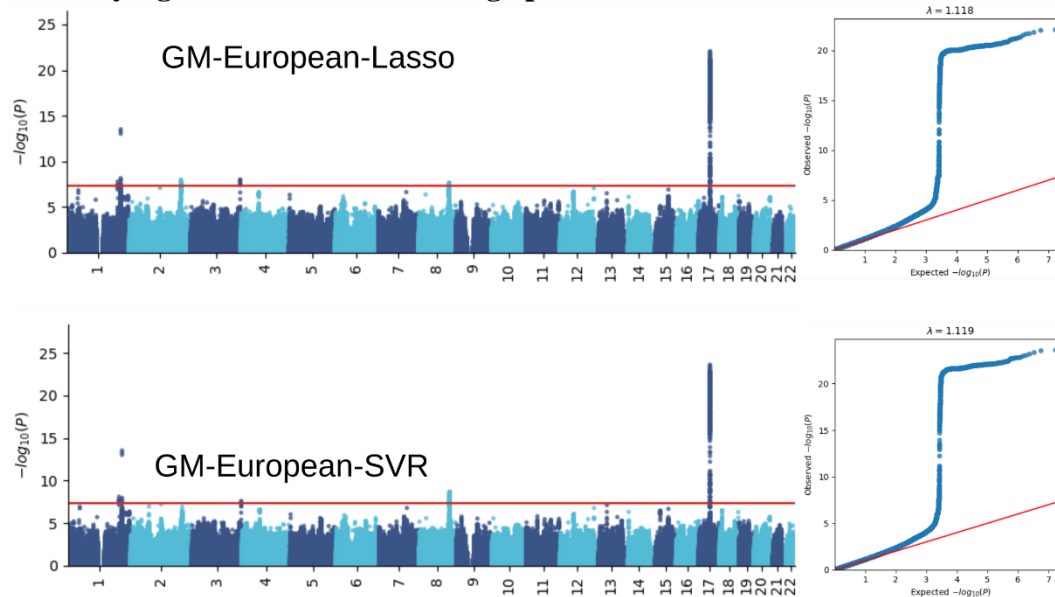

244  
 245 Genome-wide associations are presented for GM-BAG derived from Lasso regression (shown in  
 246 the main text) and SVR, and CNN using voxel-wise images (GWAS summary statistics shared  
 247 by a previous study which achieved an MAE  $\sim 2.5$  years). Refer to **Fig. 1a** in the reference  
 248 paper<sup>2</sup> for the Manhattan plot. Genomic loci associated were identified using a genome-wide P-  
 249 value threshold [ $-\log_{10}(\text{P-value}) > 7.30$ ]. The sample sizes for GM-European-Lasso and GM-  
 250 European-SVR are 31557.  
 251

252 **Supplementary figure 6: Feature type-specific GWAS**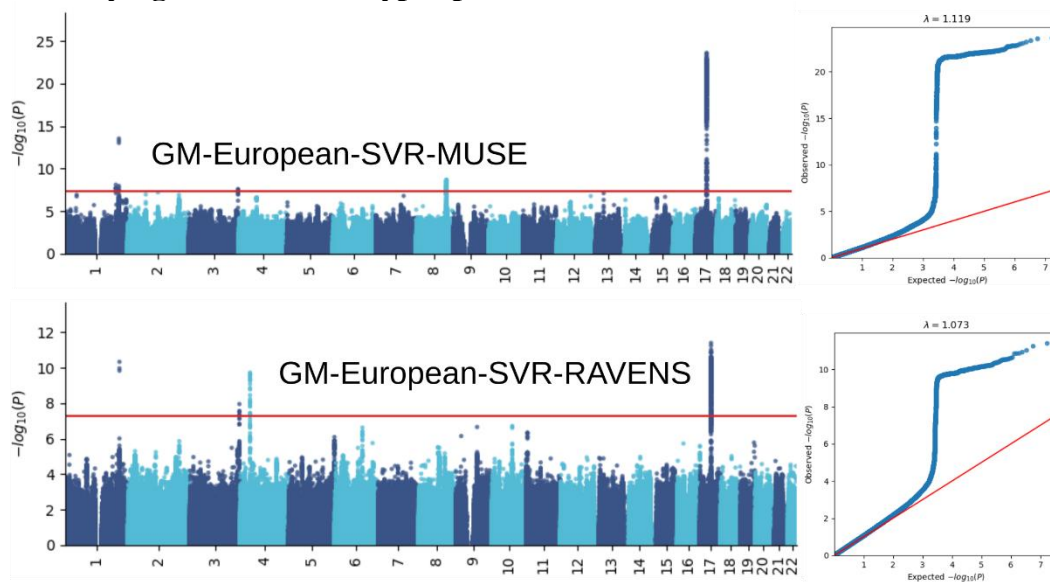

253  
 254 Genome-wide associations are presented for GM-BAG derived from MUSE ROIs (shown in the  
 255 main text) and RAVENS voxel maps. Genomic loci associated were identified using a genome-  
 256 wide P-value threshold [ $-\log_{10}(P\text{-value}) > 7.30$ ]. The sample sizes for GM-European-SVR-  
 257 MUSE and GM-European-SVR-RAVENS are 31557.  
 258



259 **Supplementary figure 7: Independent WGS dataset for GM-BAG GWAS**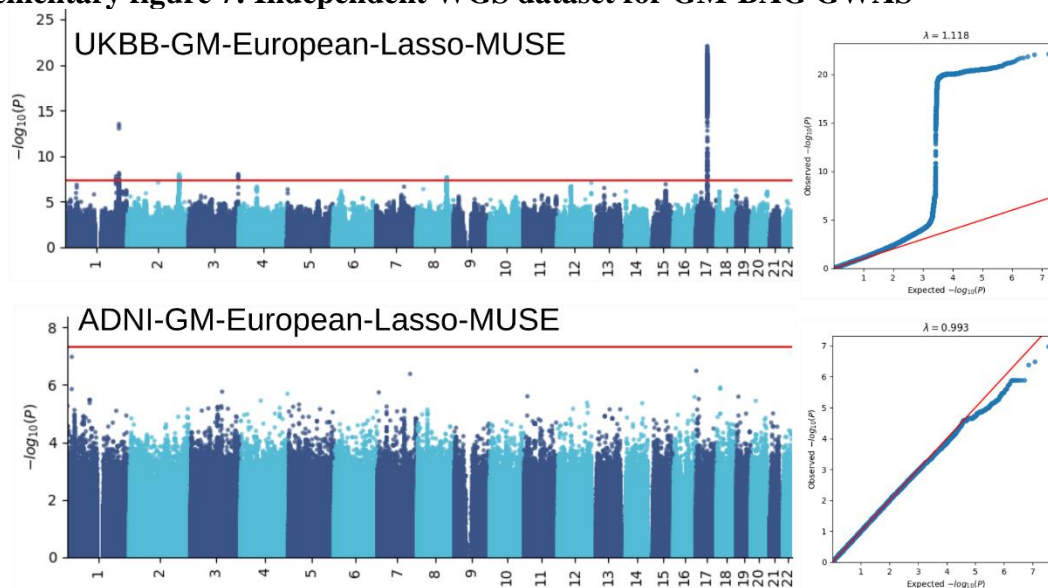

260  
 261 Genome-wide associations are presented for GM-BAG derived from MUSE ROIs (shown in the  
 262 main text) using UKBB imputed genotyping data vs. ADNI WGS data. Genomic loci associated  
 263 were identified using a genome-wide P-value threshold [ $-\log_{10}(\text{P-value}) > 7.30$ ]. The genetic  
 264 quality check steps for the ADNI GWAS are detailed elsewhere<sup>11</sup>. The GM-BAG was  
 265 generated by training a Lasso regression model from the ground up, utilizing ADNI healthy  
 266 control participants, and achieving a similar Mean Absolute Error (MAE) of 4.24 years.  
 267 However, when we directly applied the trained model to the ADNI population using UKBB data,  
 268 we observed a higher MAE, ranging from 4.39 to 9.16 years. This discrepancy could potentially  
 269 be attributed to the fact that ADNI participants tend to be older than those in the UKBB dataset.  
 270 For ADNI WGS data, we first convert the VCF files into *plink* binary format. We excluded  
 271 related individuals (up to 2<sup>nd</sup>-degree) using the KING software for family relationship  
 272 inference.<sup>10</sup> Further QC steps are: excluding criteria were: i) individuals with more than 2% of  
 273 missing genotypes; ii) variants with minor allele frequency (MAF) of less than 0.1%; iii) variants  
 274 with larger than 5% missing genotyping rate; iv) variants that failed the Hardy-Weinberg test at  
 275  $1 \times 10^{-5}$ . We then removed duplicated variants from all 22 autosomal chromosomes. We also  
 276 excluded individuals for whom either imaging or genetic data were not available. To adjust for  
 277 population stratification,<sup>11</sup> we derived the first 40 genetic principal components (PC) using the  
 278 SmartPCA software<sup>12</sup>. The sample sizes for UKBB-GM-European-Lasso-MUSE and ADNI-  
 279 GM-European-Lasso-MUSE are 31557 and 1104, respectively.

280  
 281

282 **Supplementary figure 8: Genetic correlation ( $g_c$ ) between the GM, WM, and FC-BAG**  
 283 **using the LDSC software in the split-sample analyses**

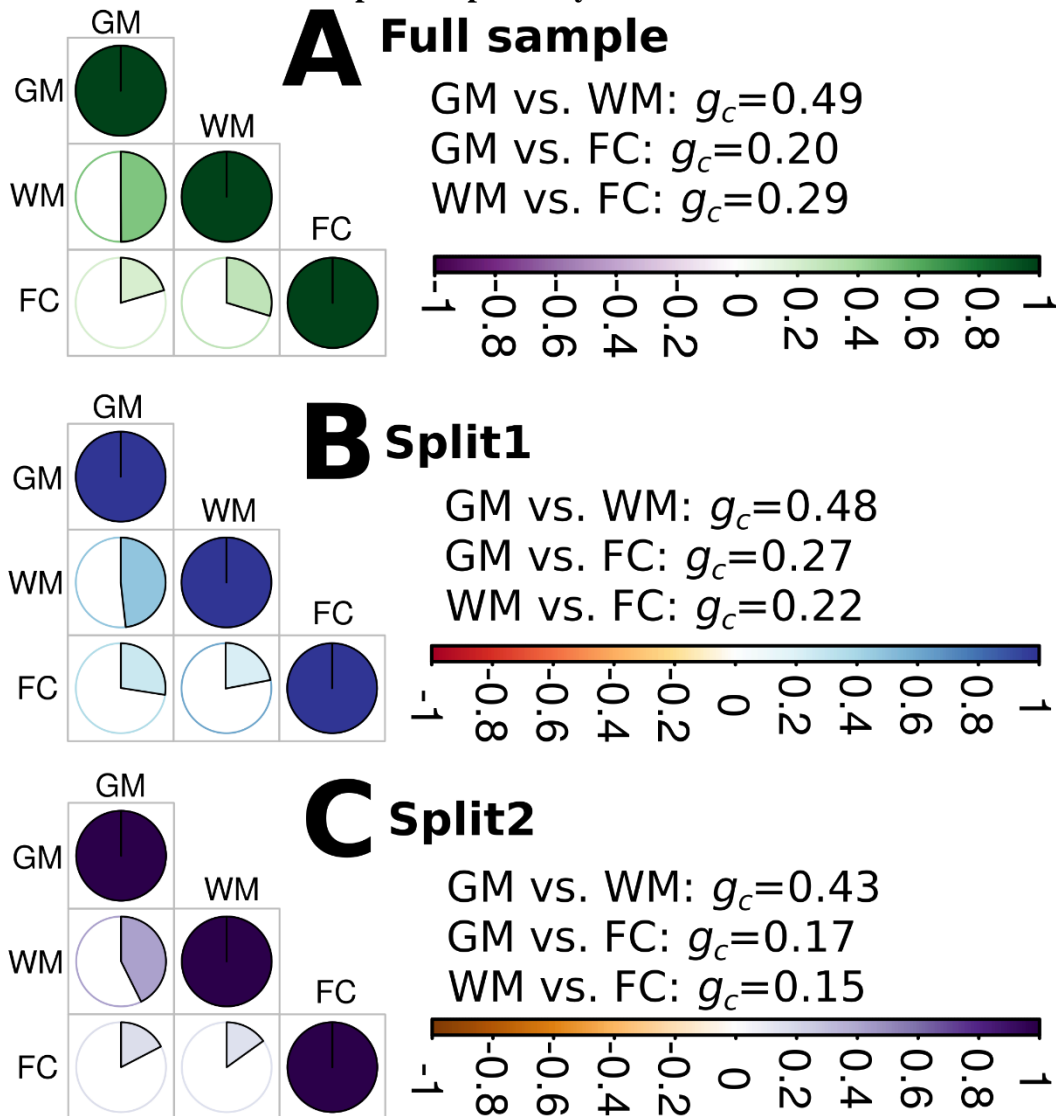

284 **A) Genetic correlation using the full samples. B) Genetic correlation using the split1 sample. C)**  
 285 **Genetic correlation using the split2 sample.**  
 286  
 287

288 **Supplementary figure 9: Incremental R<sup>2</sup> of the PRS derived by the PLINK C+T approach**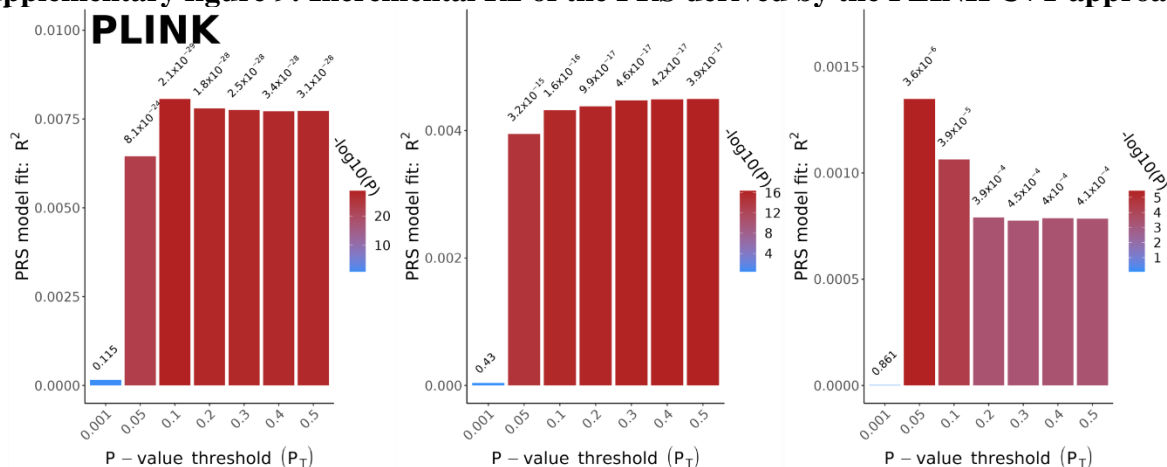

289  
 290 Incremental R<sup>2</sup> of the PRS derived by the PLINK C+T approach to predict the GM, WM, and  
 291 FC-BAG in the target/test data (i.e., the split2 GWAS population in the split-sample analyses).  
 292 The y-axis indicates the proportions of phenotypic variation (GM, WM, and FC-BAG) that the  
 293 PRS can significantly and additionally explain. The x-axis lists the seven P-value thresholds  
 294 considered.

295 **Supplementary figure 10: Results for the inverse Mendelian randomization for the seven**  
 296 **clinical traits**

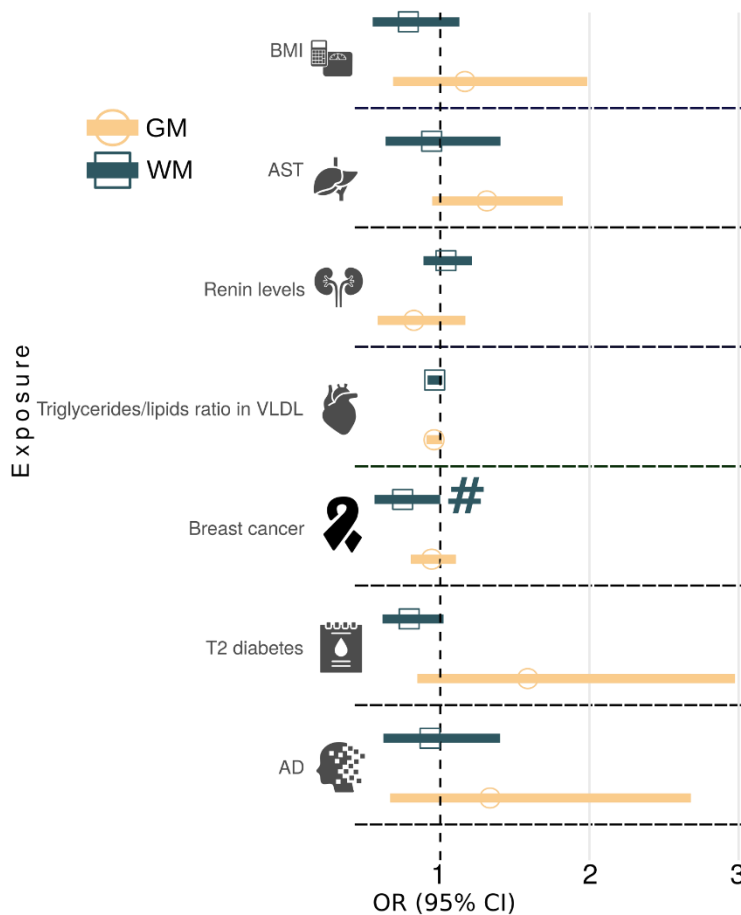

297 The inverse causal inference was performed using a two-sample Mendelian Randomization  
 298 approach for seven selected clinical traits as outcome variables and GM, WM, and FC-BAG as  
 299 exposure variables. Shapes (circle and rectangle) represent the Odds Ratio (OR), and its 95%  
 300 confidence interval (CI) is also presented. The symbol # indicates that the tests pass the nominal  
 301 P-value threshold (two-sided) of 0.05 but do not survive the FDR correction. Abbreviation: AD:  
 302 Alzheimer's Disease; AST: Aspartate Aminotransferase; BMI: Body Mass Index; VLDL: Very  
 303 Low-Density Lipoprotein. The exact statistics (e.g., P-value) are shown in Supplementary Data  
 304 12.

305  
 306  
 307

308 **Supplementary figure 11: Sensitivity check for all other significant exposure variables in**  
 309 **the forward MR analyses for 1) breast cancer on GM-BAG, 2) diabetes on GM-BAG, and**  
 310 **3) AD on WM-BAG.**

311 **1) Sensitivity checks of causal effects of breast cancer on GM-BAG. A)** Scatter plot indicates  
 312 one potential outlier. **B)** Funnel plot shows no obvious asymmetry and points out two outliers. **C)**  
 313 Single-SNP MR results. **D)** Leave-one-out analyses. Each dot represents the mean value of the  
 314 estimated parameters, and the error bar displays its 95% confidence interval (**C, D**) or standard  
 315 errors of the parameters (**A**).

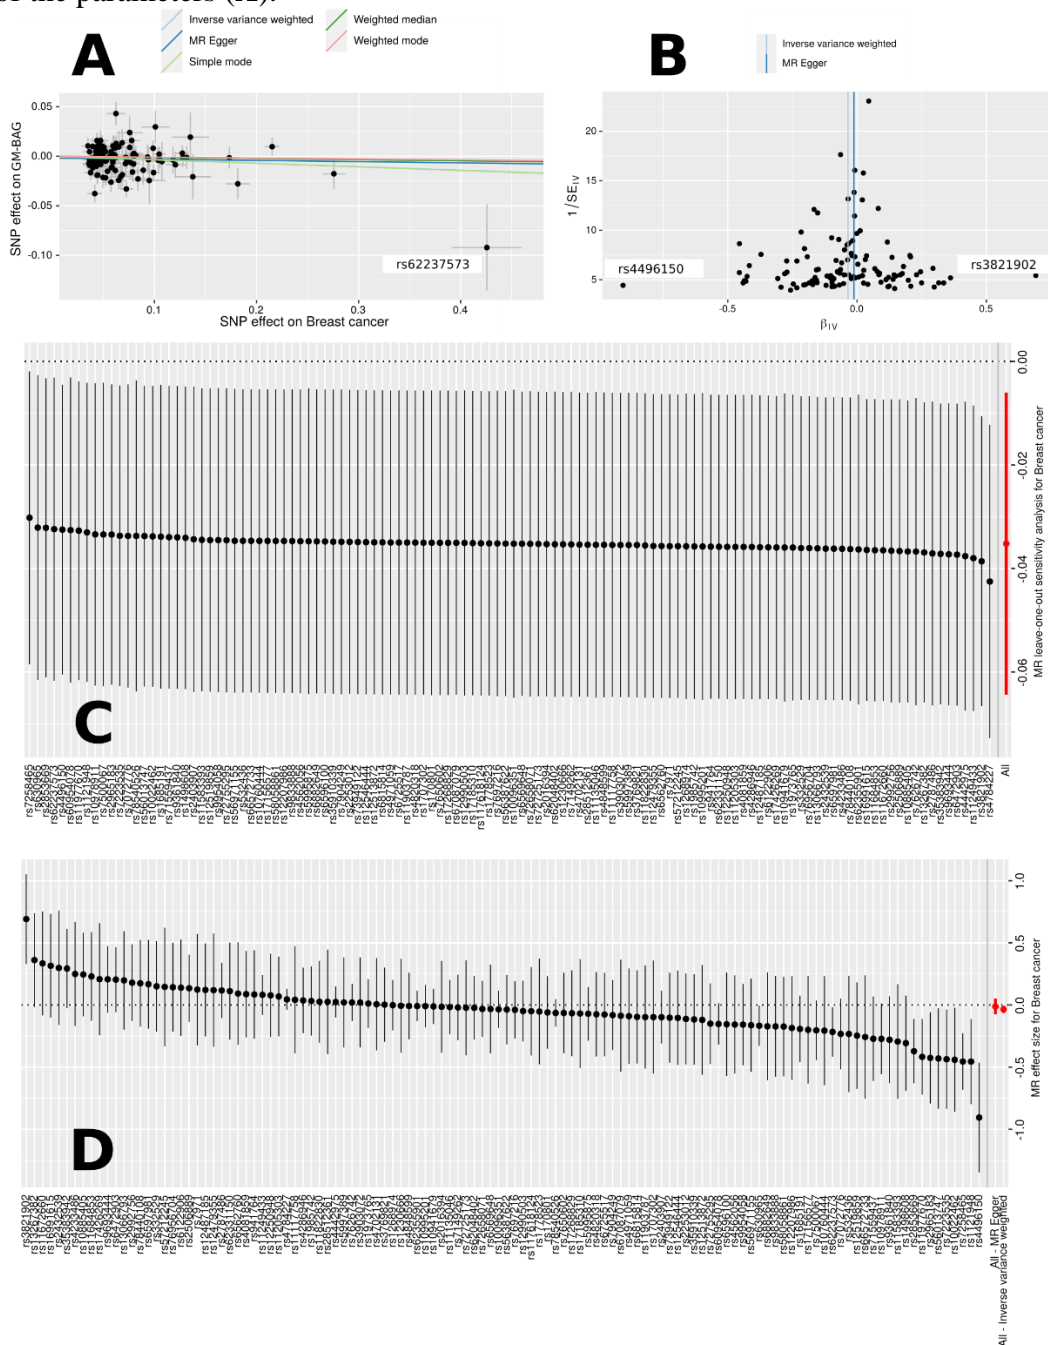

316  
 317

318 **2)** Sensitivity checks of causal effects of type 2 diabetes on GM-BAG. **A)** Scatter plot for the  
 319 heterogeneity of the causal effects. **B)** Funnel plot shows the asymmetry of the causal effects. **C)**  
 320 Single-SNP MR results. **D)** Leave-one-out analyses. Each dot represents the mean value of the  
 321 estimated parameters, and the error bar displays its 95% confidence interval (**C, D**) or standard  
 322 errors of the parameters (**A**).

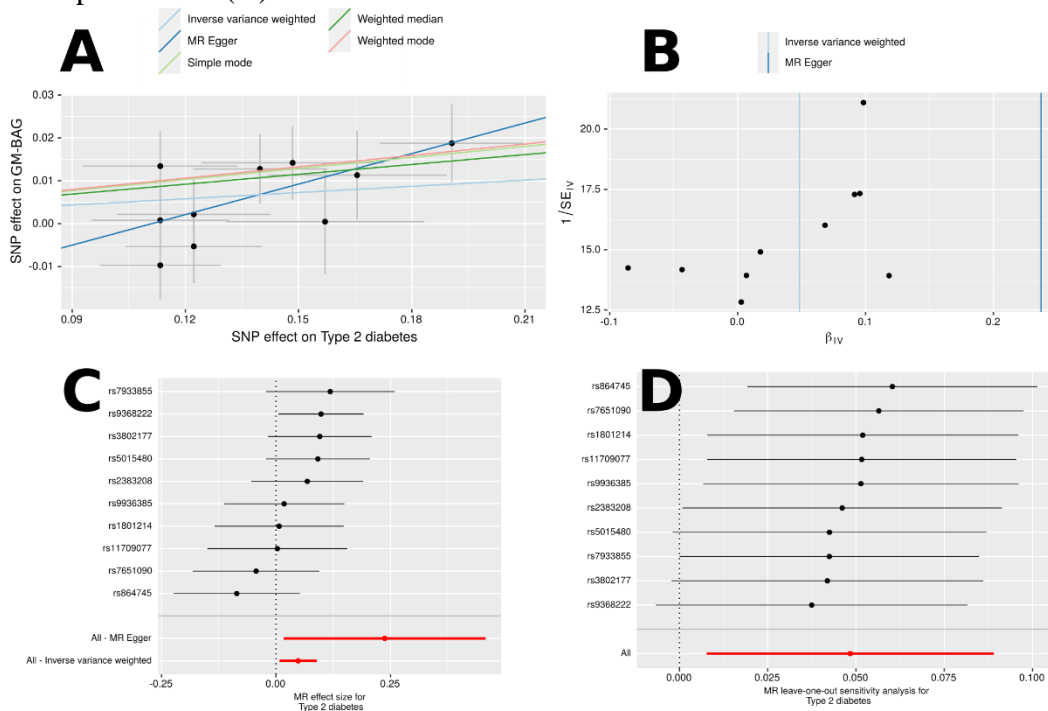

323  
 324

325 **3) Sensitivity checks of causal effects of AD on WM-BAG. A)** Scatter plot for the heterogeneity  
 326 of the causal effects. **B)** Funnel plot shows no apparent asymmetry of the causal effects. **C)**  
 327 Single-SNP MR results. **D)** Leave-one-out analyses. Each dot represents the mean value of the  
 328 estimated parameters, and the error bar displays its 95% confidence interval (**C, D**) or standard  
 329 errors of the parameters (**A**).

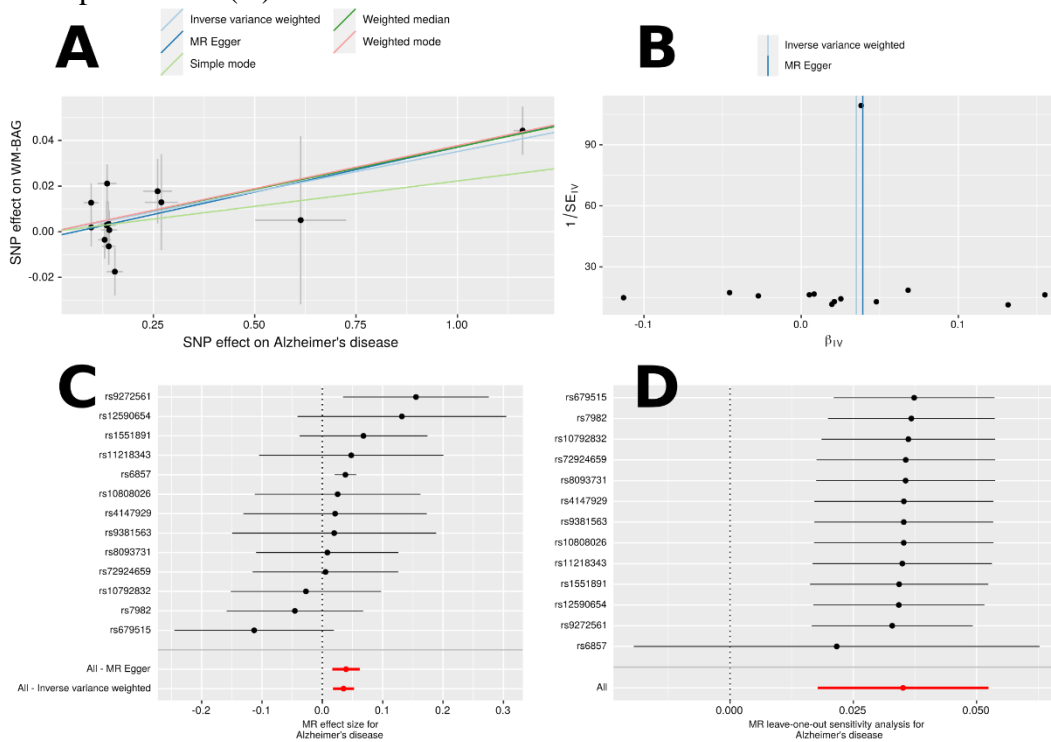

330  
331

332 **Supplementary figure 12: RNA expression overview of the *DNAJCI* gene in various cancer**  
 333 **types.**

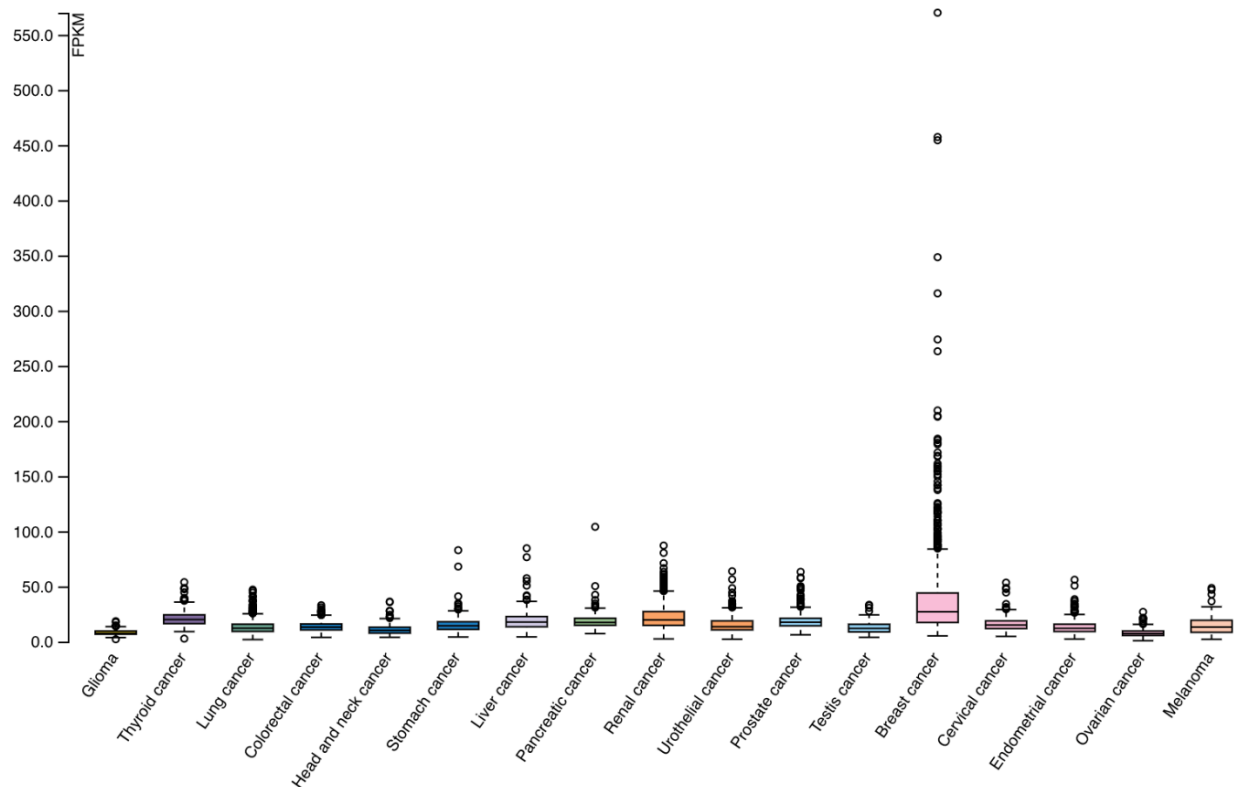

334 RNA expression overview shows RNA-seq data from The Cancer Genome Atlas (TCGA)  
 335 project. FPKM represents fragments per kilobase of transcript per million mapped reads. The  
 336 estimated gene expression values of the *DNAJCI* gene are displayed for 17 types of  
 337 cancer/tumors.  
 338  
 339



340 **Supplementary figure 13: The five-layer neural network used for age prediction and its**  
 341 **performance using WM-IDP**

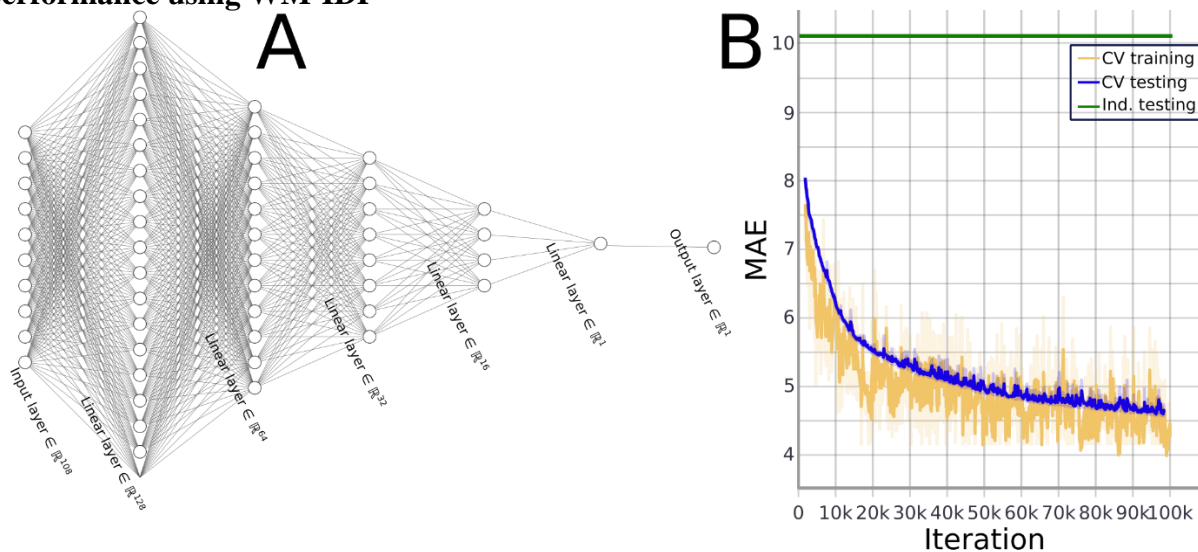

342 **A)** We illustrate the neural network architecture utilized in this study to predict brain age using  
 343 GM, WM, and FC-IDP. The dimensionality of neurons in each linear layer is indicated in the  
 344 diagram. **B)** We present the results of the cross-validation (CV) training, CV testing, and  
 345 independent testing loss for the WM-IDP using FA, MD, ODI, and NDI from the TBSS-based  
 346 approach. Notably, the network overfits the 108 WM-IDP since the number of network  
 347 parameters (38,364) is significantly greater than the number of features (108). In addition,  
 348 features from FA, MD, ODI, and NDI are highly correlated.  
 349  
 350

351 **Supplementary table 1: Brain age prediction performance using GM, WM, and FC-IDP.**

352 We reported each machine learning model's mean absolute errors (MAE, year) and Pearson's  
 353 correlation coefficient ( $r$ ). The cross-validated (CV Test) and independent (Ind. Test) testing  
 354 results were shown. Table **A** shows the results from the CV Test and the independent (Ind.) Test  
 355 performance. Table **B** contains the results of the sex-stratified experiments.

356 **A: Brain age prediction results from the CV and independent test dataset.** The bolded text  
 357 represents the lowest MAE for IDPs from each MRI modality. For WM-IDP, we fit the models  
 358 with different combinations of features: i) 108 weighted mean TBSS WM-IDP from FA, MD,  
 359 OD, and NDI; ii) 192 skeleton mean values of WM-IDP from FA, MD, OD, and NDI; iii) 48 FA  
 360 WM-IDP.

| IDP                                        | Dataset   | Linear SVR    |      | Lasso regression |             | MLP           |      | NN            |      |
|--------------------------------------------|-----------|---------------|------|------------------|-------------|---------------|------|---------------|------|
|                                            |           | MAE           | $r$  | MAE              | $r$         | MAE           | $r$  | MAE           | $r$  |
| GM-IDP                                     | CV Test   | 4.86±0.1<br>1 | 0.77 | 4.92±0.1<br>1    | 0.77        | 4.88±0.1<br>3 | 0.77 | 4.42±0.1<br>1 | 0.79 |
|                                            | Ind. Test | 4.43          | 0.66 | <b>4.39</b>      | <b>0.66</b> | 5.35          | 0.64 | 4.83          | 0.65 |
| 108<br>TBSS                                | CV Test   | 4.88±0.1<br>1 | 0.77 | 4.94±0.1<br>1    | 0.78        | 5.29±0.1<br>3 | 0.75 | 4.54±0.1<br>1 | 0.79 |
|                                            | Ind. Test | 5.27          | 0.53 | 6.29             | 0.53        | 7.41          | 0.59 | 10.12         | 0.31 |
| WM-<br>IDP<br>192<br>FA/M<br>D/OD<br>I/NDI | CV Test   | 4.07±0.1<br>0 | 0.84 | 4.142±0.<br>11   | 0.84        | 4.34±0.1<br>2 | 0.83 | 3.50±0.1<br>0 | 0.87 |
|                                            | Ind. Test | 21.90         | 0.71 | 21.66            | 0.73        | 6.12          | 0.71 | 15.77         | 0.30 |
| 48 FA                                      | CV Test   | 5.12±0.1<br>2 | 0.75 | 5.15±0.1<br>1    | 0.75        | 5.32±0.1<br>3 | 0.73 | 6.85±0.1<br>5 | 0.56 |
|                                            | Ind. Test | 5.02          | 0.65 | <b>4.92</b>      | <b>0.65</b> | 7.95          | 0.60 | 6.84          | 0.42 |
| FC-IDP                                     | CV Test   | 6.28±0.1<br>6 | 0.58 | 6.51±0.1<br>6    | 0.59        | 6.07±0.1<br>7 | 0.66 | 5.88±0.1<br>5 | 0.63 |
|                                            | Ind. Test | 5.97          | 0.43 | <b>5.48</b>      | <b>0.44</b> | 6.02          | 0.46 | 6.05          | 0.43 |

361  
 362  
 363  
 364  
 365

366

367 **B: Brain age prediction results from the sex-stratified experiments.**

| IDP    | Gender | Set       | Linear SVR            |      | Lasso regression      |      | MLP                   |      | NN                    |      |
|--------|--------|-----------|-----------------------|------|-----------------------|------|-----------------------|------|-----------------------|------|
|        |        |           | MAE                   | $r$  | MAE                   | $r$  | MAE                   | $r$  | MAE                   | $r$  |
| GM-IDP | Female | CV Test   | 4.77±0.1 <sub>8</sub> | 0.77 | 4.89±0.1 <sub>7</sub> | 0.77 | 4.93±0.2 <sub>3</sub> | 0.76 | 4.25±0.1 <sub>6</sub> | 0.80 |
|        |        | Ind. Test | 4.46                  | 0.64 | 4.44                  | 0.64 | 6.94                  | 0.60 | 5.02                  | 0.62 |
|        | Male   | CV Test   | 4.69±0.1 <sub>6</sub> | 0.78 | 4.77±0.1 <sub>6</sub> | 0.79 | 4.70±0.2 <sub>2</sub> | 0.79 | 4.08±0.1 <sub>7</sub> | 0.82 |
|        |        | Ind. Test | 4.58                  | 0.65 | 4.49                  | 0.66 | 5.03                  | 0.65 | 4.85                  | 0.64 |
| WM-IDP | Female | CV Test   | 4.81±0.1 <sub>6</sub> | 0.78 | 4.77±0.1 <sub>7</sub> | 0.79 | 4.73±0.1 <sub>7</sub> | 0.78 | 5.61±0.1 <sub>7</sub> | 0.66 |
|        |        | Ind. Test | 25.97                 | 0.61 | 26.39                 | 0.62 | 31.68                 | 0.56 | 19.21                 | 0.55 |
|        | Male   | CV Test   | 4.83±0.2 <sub>1</sub> | 0.77 | 4.86±0.2 <sub>5</sub> | 0.79 | 5.24±0.2 <sub>6</sub> | 0.75 | 5.80±0.1 <sub>9</sub> | 0.68 |
|        |        | Ind. Test | 7.88                  | 0.63 | 5.67                  | 0.62 | 10.24                 | 0.62 | 14.96                 | 0.56 |
| FC-IDP | Female | CV Test   | 5.85±0.2 <sub>1</sub> | 0.62 | 6.01±0.2 <sub>0</sub> | 0.64 | 6.41±0.2 <sub>3</sub> | 0.61 | 5.07±0.2 <sub>0</sub> | 0.69 |
|        |        | Ind. Test | 5.93                  | 0.42 | 5.58                  | 0.42 | 5.36                  | 0.42 | 6.28                  | 0.41 |
|        | Male   | CV Test   | 6.03±0.2 <sub>3</sub> | 0.60 | 6.32±0.2 <sub>2</sub> | 0.62 | 6.83±0.2 <sub>3</sub> | 0.59 | 6.11±0.2 <sub>2</sub> | 0.62 |
|        |        | Ind. Test | 6.01                  | 0.40 | 5.64                  | 0.41 | 6.79                  | 0.42 | 5.78                  | 0.41 |

368

369

370 **Supplementary table 2: Identified genomic loci and mapped genes.**

371 Two-sided P-values were derived from our linear regression GWAS.

372 **GM-BAG:**

| Locus | Top lead SNP | P-value                | Chromosome | Mapped genes                                                                                                                              |
|-------|--------------|------------------------|------------|-------------------------------------------------------------------------------------------------------------------------------------------|
| 1     | rs61732315   | 1.63x10 <sup>-8</sup>  | 1          | <i>MYOG, PPFIA4, ADORA1</i>                                                                                                               |
| 2     | rs1452628    | 3.04x10 <sup>-14</sup> | 1          | <i>KCNK2, KCTD3</i>                                                                                                                       |
| 3     | rs186399184  | 1.05x10 <sup>-8</sup>  | 2          | <i>CYP20A1, CARF, FAM117B, WDR12, ABI2, NBEAL1, ICA1L</i>                                                                                 |
| 4     | rs10933668   | 9.41x10 <sup>-9</sup>  | 3          | NA                                                                                                                                        |
| 5     | rs34051980   | 2.02x10 <sup>-8</sup>  | 8          | <i>TNFRSF11B, COLEC10</i>                                                                                                                 |
| 6     | rs534115641  | 8.44x10 <sup>-23</sup> | 17         | <i>NSF, WNT3, KANSL1, CRHR1, NMT1, ARHGAP27, LRRC37A, EFCAB13, C17orf104, FMNL1, SPPL2C, ARL17A, MAPT, PLEKHM1, ARL17B, LRRC37A2, STH</i> |

373

374 **WM-BAG:**

| Locus | Top lead SNP | P-value                 | Chromosome | Mapped genes                                                                                                                                                                                  |
|-------|--------------|-------------------------|------------|-----------------------------------------------------------------------------------------------------------------------------------------------------------------------------------------------|
| 1     | rs11118475   | 3.69x10 <sup>-09</sup>  | 1          | <i>CD46, CRIL</i>                                                                                                                                                                             |
| 2     | rs61067594   | 6.01x10 <sup>-19</sup>  | 3          | <i>GMNC</i>                                                                                                                                                                                   |
| 3     | rs967140     | 7.26 x10 <sup>-12</sup> | 4          | <i>PPARGC1A</i>                                                                                                                                                                               |
| 4     | rs2533872    | 9.95 x10 <sup>-10</sup> | 7          | <i>GNAI2, AMZ1</i>                                                                                                                                                                            |
| 5     | rs564819152  | 9.39 x10 <sup>-13</sup> | 10         | <i>SPAG6, MLLT10, DNAJC1, COMMD3, BMI1, SKIDA1, CASC10, COMMD3-BMI1</i>                                                                                                                       |
| 6     | rs12146713   | 7.67 x10 <sup>-14</sup> | 12         | <i>NUAK1</i>                                                                                                                                                                                  |
| 7     | rs654276     | 1.96 x10 <sup>-08</sup> | 15         | <i>TP53BP1, WDR76, ELL3, TUBGCP4, MFAP1, SERF2, ZSCAN29, TGM7, CASC4, CATSPER2, MAP1A, PDIA3, PPIP5K1, ADAL, LCMT2, FRMD5, SERINC4, CKMT1A, CKMT1B, HYPK, STRC, RP11-296A16.1, AC018512.1</i> |
| 8     | rs4843550    | 2.84 x10 <sup>-09</sup> | 16         | <i>C16orf95</i>                                                                                                                                                                               |
| 9     | rs1894525    | 2.71x10 <sup>-09</sup>  | 22         | <i>NOL12, TRIOBP, GCAT, ANKRD54, EIF3L, MICALL1, PICK1, GALR3, H1FO</i>                                                                                                                       |

375

376 **FC-BAG:**

| Locus | Top lead SNP | P-value               | Chromosome | Mapped genes |
|-------|--------------|-----------------------|------------|--------------|
| 1     | rs5877290    | 2.31x10 <sup>-8</sup> | 6          | NA           |

377

378 **Supplementary table 3: Selected clinical traits for genetic correlation analyses.** We selected  
 379 the candidate studies from the GWAS Catalog for specific traits, including neurodegenerative  
 380 diseases, psychiatric disorders, education, and intelligence. The inclusion criteria are i) GWAS  
 381 summary statistics are publicly available; ii) the study population is European ancestry in the  
 382 majority; iii) the heritability estimates ( $h^2$ ) via LDSC are not spuriously low ( $h^2 > 0.05$ ). This  
 383 resulted in six clinical traits. We present the clinical trait, the dataset used, the URL link, the  
 384 Pubmed ID, and the sample size. Abbreviations: PGC: psychiatric genomics consortium; ADHD:  
 385 attention deficit hyperactivity disorder; ASD: autism spectrum disorder; MDD: major depressive  
 386 disorder; OCD: obsessive-compulsive disorder; SCZ: schizophrenia; BPD: bipolar disorder;  
 387 SSGAC: Social Science Genetic Association Consortium; UKBB: UK Biobank.

| Trait        | Dataset | URL                                                                                                                                     | PubMed ID/GWAS Catalog ID | Sample size |
|--------------|---------|-----------------------------------------------------------------------------------------------------------------------------------------|---------------------------|-------------|
| AD           | Meta    | <a href="http://ftp.ebi.ac.uk/pub/databases/gwas">http://ftp.ebi.ac.uk/pub/databases/gwas</a>                                           | 30820047                  | 63,926      |
| AD subtypes  | UKBB    | <a href="https://labs.loni.usc.edu/medicine/organ_systems/brain">https://labs.loni.usc.edu/medicine/organ_systems/brain</a>             | NA                        | 33,540      |
| ADHD         | PGC     | <a href="https://figshare.com/articles/dataset/adhd2019/14671965">https://figshare.com/articles/dataset/adhd2019/14671965</a>           | 30478444                  | 53,293      |
| ASD          | PGC     | <a href="https://figshare.com/articles/dataset/asd2019/14671989">https://figshare.com/articles/dataset/asd2019/14671989</a>             | 30804558                  | 46,350      |
| ASD subtypes | UKBB    | <a href="https://labs.loni.usc.edu/medicine/organ_systems/brain">https://labs.loni.usc.edu/medicine/organ_systems/brain</a>             | 37017948                  | 14,786      |
| BPD          | PGC     | <a href="https://figshare.com/articles/dataset/bip2019/14671998">https://figshare.com/articles/dataset/bip2019/14671998</a>             | 31043756                  | 51,710      |
| MDD          | Meta    | <a href="https://figshare.com/articles/dataset/mdd2013/14672082">https://figshare.com/articles/dataset/mdd2013/14672082</a>             | 22472876                  | 18,759      |
| Education    | SSGAC   | <a href="http://ftp.ebi.ac.uk/pub/databases/gwas">http://ftp.ebi.ac.uk/pub/databases/gwas</a>                                           | 23722424                  | 126,559     |
| Intelligence | CTGlab  | <a href="http://ftp.ebi.ac.uk/pub/databases/gwas">http://ftp.ebi.ac.uk/pub/databases/gwas</a>                                           | 28530673                  | 78,308      |
| SCZ          | PGC     | <a href="https://figshare.com/articles/dataset/scz2013sweden/14672154">https://figshare.com/articles/dataset/scz2013sweden/14672154</a> | 23974872                  | 11,244      |
| SCZ subtypes | UKBB    | <a href="https://www.cbica.upenn.edu/bridgeport">https://www.cbica.upenn.edu/bridgeport</a>                                             | 32103250                  | 14,786      |
| OCD          | Meta    | <a href="https://figshare.com/articles/dataset/ocd2018/14672103">https://figshare.com/articles/dataset/ocd2018/14672103</a>             | 28761083                  | 9,725       |

388

389

390

391 **Supplementary table 4: Selected exposure variables for the forward Mendelian**  
 392 **randomization.** We present here the traits, searching keywords, PubMed ID of the study, and the  
 393 IEU ID. MR mimics randomized clinical trials using genetic variants (SNP) randomly allocated at  
 394 conception as instrumental variables (IV) to estimate the causal effect of an exposure (e.g., alcohol  
 395 consumption) on an outcome (e.g., GM-BAG). In essence, MR is less prone to confounding and  
 396 reverse causation bias. Genetic variants, however, must be associated with the exposure variable  
 397 (relevance assumption), not associated with the outcome biased by confounders (exchangeability  
 398 assumption), and only associated with the outcome through the exposure (exclusivity assumption).  
 399 In particular, we automatically queried these traits in the IEU GWAS database<sup>12</sup> – curated GWAS  
 400 summary statistics for MR – to extract the IVs from i) European ancestry, ii) non-UKBB studies  
 401 (our GWAS were derived from UKBB data), iii) and large sample sizes. Another rationale for  
 402 performing this hypothesis-driven MR analysis was the extensive coverage of UK Biobank  
 403 (UKBB) in the IEU GWAS database, necessitating the exclusion of UKBB-based GWAS from  
 404 our analysis to mitigate potential biases associated with sample overlap. AD: Alzheimer’s disease.  
 405

| Trait                          | Searching keyword             | PubMed ID | IEU ID                   | N                                        |
|--------------------------------|-------------------------------|-----------|--------------------------|------------------------------------------|
| AD                             | Alzheimer                     | 24162737  | ebi-a-GCST002245         | 17008 AD and<br>37154 controls           |
| Breast cancer                  | cancer                        | 29059683  | ieu-a-1126               | 122,977 cases<br>and 105,974<br>controls |
| Type 2 diabetes                | diabetes                      | 22885922  | ieu-a-26                 | 34,840 cases<br>and 114,981<br>controls  |
| Renin level                    | Renin                         | 33067605  | ebi-a-GCST90012038       | 30,931                                   |
| Triglyceride-to-lipid<br>ratio | Triglyceride                  | 32114887  | met-d-<br>XL_VLDL_TG_pct | 16,126                                   |
| AST                            | Aspartate<br>aminotransferase | 29875488  | prot-a-1241              | 3301                                     |
| BMI                            | Body mass index               | 23563607  | ieu-a-85                 | 263,407                                  |

406

407 **Supplementary table 5: Study characteristics.**

408 The current table presents participants of all ancestries for the age prediction task. We  
 409 constrained participants with only European ancestry for downstream genetic analyses. \* For age  
 410 and sex, we reported statistics for the overlapping population of the three modalities: 35,261  
 411 participants for the entire population, 4000 participants for the training/validation/test dataset,  
 412 and 31,261 participants for the independent test dataset. We also showed the number of  
 413 participants for the GM, WM, and FC-BAG GWAS. In total, our analyses included 42,089  
 414 unique participants who had at least one image scan. Abbreviation: dMRI: diffusion MRI;  
 415 rsfMRI: resting-state functional MRI; T1w MRI: T1-weighted MRI.  
 416

| Population (overlap)            | T1w MRI | dMRI   | rsfMRI | Age (year)*             | Sex /female* |
|---------------------------------|---------|--------|--------|-------------------------|--------------|
| Total (35,261)                  | 36,304  | 39,661 | 36,858 | 63.64<br>(45.00, 81.00) | 18,700/53%   |
| Training/validation/test (4000) | 4000    | 4000   | 4000   | 63.47<br>(46.00, 81.00) | 2000/50%     |
| Independent test (31,261)       | 32,304  | 35,661 | 32,858 | 63.66<br>(45.00, 81.00) | 16,700/53%   |
| GWAS                            | 31,557  | 31,749 | 32,017 | NA                      | NA           |

417

418

419 **References**

- 420 1. Jiang, L. *et al.* A resource-efficient tool for mixed model association analysis of large-scale  
421 data. *Nat Genet* **51**, 1749–1755 (2019).
- 422 2. Leonardsen, E. H. *et al.* Genetic architecture of brain age and its causal relations with brain  
423 and mental disorders. *Mol Psychiatry* 1–10 (2023) doi:10.1038/s41380-023-02087-y.
- 424 3. Doshi, J. *et al.* MUSE: MUlTI-atlas region Segmentation utilizing Ensembles of registration  
425 algorithms and parameters, and locally optimal atlas selection. *Neuroimage* **127**, 186–195  
426 (2016).
- 427 4. Davatzikos, C., Genc, A., Xu, D. & Resnick, S. M. Voxel-Based Morphometry Using the  
428 RAVENS Maps: Methods and Validation Using Simulated Longitudinal Atrophy.  
429 *NeuroImage* **14**, 1361–1369 (2001).
- 430 5. Hamza, T. H. *et al.* Common genetic variation in the HLA region is associated with late-onset  
431 sporadic Parkinson’s disease. *Nat Genet* **42**, 781–785 (2010).
- 432 6. Kuchenbaecker, K. B. *et al.* Identification of six new susceptibility loci for invasive epithelial  
433 ovarian cancer. *Nat Genet* **47**, 164–171 (2015).
- 434 7. de la Fuente, J., Davies, G., Grotzinger, A. D., Tucker-Drob, E. M. & Deary, I. J. A general  
435 dimension of genetic sharing across diverse cognitive traits inferred from molecular data. *Nat*  
436 *Hum Behav* **5**, 49–58 (2021).
- 437 8. Georges, A. *et al.* Genetic investigation of fibromuscular dysplasia identifies risk loci and  
438 shared genetics with common cardiovascular diseases. *Nat Commun* **12**, 6031 (2021).
- 439 9. Nagel, M., Speed, D., van der Sluis, S. & Østergaard, S. D. Genome-wide association study of  
440 the sensitivity to environmental stress and adversity neuroticism cluster. *Acta Psychiatrica*  
441 *Scandinavica* **141**, 476–478 (2020).



- 442 10. Russell, G. & Lightman, S. The human stress response. *Nat Rev Endocrinol* **15**, 525–534  
443 (2019).
- 444 11. Wen, J. *et al.* Genetic, clinical underpinnings of subtle early brain change along  
445 Alzheimer’s dimensions. 2022.09.16.508329 Preprint at  
446 <https://doi.org/10.1101/2022.09.16.508329> (2022).
- 447 12. Elsworth, B. *et al.* The MRC IEU OpenGWAS data infrastructure. 2020.08.10.244293  
448 Preprint at <https://doi.org/10.1101/2020.08.10.244293> (2020).
- 449
